# Supplementary material for: Occurrence of earthy–musty taste and odors in the Taihu Lake, China: spatial and seasonal patterns
Source: Royal Society of Chemistry journal article supplement (doi:10.1039/c6ra16733k), 2016-01-01
Supplement: c6ra16733k1.pdf [file c6ra16733k1.pdf]

1 *Supporting Information for*

2 **Occurrence of Earthy-Musty Taste and Odor in Taihu Lake, China:**  
3 **Spatial and Seasonal Patterns**

4 **Yingchao Zhang <sup>a</sup>, Ni Zhang <sup>b</sup>, Bingbing Xu <sup>c\*</sup>, Jolanta Kumirska <sup>d</sup>, Fei Qi <sup>b\*\*</sup>**

5

6 <sup>a</sup> State Key Laboratory of Automotive Simulation and Control, Jilin University,  
7 Changchun 1300022, China.

8 <sup>b</sup> State Key Laboratory of Environmental Criteria and Risk Assessment, Chinese  
9 Research Academy of Environmental Sciences, Beijing 100012, China

10 <sup>c</sup> Beijing Key Lab for Source Control Technology of Water Pollution, College of  
11 Environmental Science and Engineering, Beijing Forestry University, Beijing 100083,  
12 China.

13 <sup>d</sup> Department of Environmental Analysis, Faculty of Chemistry, University of Gdansk,  
14 Wita Stwosza 63, 80-308, Poland

15

16 \* Corresponding author, Prof. Fei Qi,

17 Tel.: 86 10 62336615; Fax: 86 10 62336596

18 Email address: [qifei@bjfu.edu.cn](mailto:qifei@bjfu.edu.cn); [qifei\\_hit@163.com](mailto:qifei_hit@163.com)

19 Co-Corresponding author, Bingbing Xu

20 Email address: [xbb\\_hit@126.com](mailto:xbb_hit@126.com)

21

22 Page: 6; Table: 3.

24 Table S1: Sampling Sites in Taihu Lake

| Lake Zone         | Sampling Site | Coordinate            |                       |
|-------------------|---------------|-----------------------|-----------------------|
|                   |               | North<br>latitude (N) | East<br>longitude (E) |
| Zhushan Lake (I)  | TH-1          | N31°25.965'           | 120°01.859'           |
|                   | TH-17         | N31°26.912'           | 120°01.768'           |
|                   | TH-18         | N31°28.654'           | 120°02.304'           |
|                   | TH-19         | N31°27.426'           | 120°03.264'           |
|                   | TH-20         | N31°23.756'           | 120°03.376'           |
|                   | TH-40         | N31°24.865'           | 120°02.020'           |
| Meiliang Bay (II) | TH-21         | N31°24.531'           | 120°08.112'           |
|                   | TH-22         | N31°30.254'           | 120°09.207'           |
|                   | TH-23         | N31°30.844'           | 120°12.152'           |
|                   | TH-24         | N31°27.049'           | 120°11.644'           |
|                   | TH-25         | N31°24.146'           | 120°12.178'           |
| Gonghu Lake (III) | TH-26         | N31°20.976'           | 120°12.981'           |
|                   | TH-27         | N31°26.271'           | 120°19.367'           |
|                   | TH-28         | N31°26.345'           | 120°23.038'           |
|                   | TH-29         | N31°23.054'           | 120°18.949'           |
|                   | TH-30         | N31°18.536'           | 120°15.728'           |
| West Coast (IV)   | TH-2          | N31°22.423'           | 119°58.883'           |
|                   | TH-3          | N31°18.965'           | 119°57.018'           |
|                   | TH-4          | N31°13.703'           | 119°54.028'           |
|                   | TH-5          | N31°06.440'           | 119°57.380'           |
|                   | TH-6          | N31°02.044'           | 120°00.305'           |
|                   | TH-39         | N31°19.247'           | 119°58.761'           |
| South Lakes (V)   | TH-7          | N30°57.534'           | 120°08.486'           |
|                   | TH-8          | N30°56.395'           | 120°13.357'           |
|                   | TH-9          | N30°56.447'           | 120°18.826'           |

|                          |              |             |             |
|--------------------------|--------------|-------------|-------------|
|                          | <b>TH-10</b> | N30°58.415' | 120°15.701' |
|                          | <b>TH-11</b> | N30°59.957' | 120°11.800' |
|                          | <b>TH-12</b> | N31°03.036' | 120°10.874' |
|                          | <b>TH-31</b> | N31°17.485' | 120°17.830' |
|                          | <b>TH-32</b> | N31°17.920' | 120°20.130' |
| <b>East Coast (VI)</b>   | <b>TH-33</b> | N31°16.511' | 120°18.156' |
|                          | <b>TH-34</b> | N31°14.549' | 120°19.356' |
|                          | <b>TH-35</b> | N31°12.126' | 120°14.351' |
|                          | <b>TH-13</b> | N31°08.916' | 120°12.241' |
|                          | <b>TH-14</b> | N31°12.005' | 120°12.328' |
|                          | <b>TH-15</b> | N31°15.062' | 120°12.070' |
| <b>Lake Centre (VII)</b> | <b>TH-16</b> | N31°17.987' | 120°12.127' |
|                          | <b>TH-36</b> | N31°11.774' | 120°09.330' |
|                          | <b>TH-37</b> | N31°12.732' | 120°04.360' |
|                          | <b>TH-38</b> | N31°13.282' | 119°58.577' |

25  
26  
27

Table S2: Characteristics of water quality in Taihu Lake

| Lake zone                |        | Temp. (°C) | DO (mg/L) | pH   | UV254 | DOC (mg/L) | TN (mg/L) | TP (mg/L) | NH <sub>4</sub> -N (mg/L) | NO <sub>3</sub> -N (mg/L) | SO <sub>4</sub> <sup>2-</sup> (mg/L) | Chlorophyll-a (µg/L) |
|--------------------------|--------|------------|-----------|------|-------|------------|-----------|-----------|---------------------------|---------------------------|--------------------------------------|----------------------|
| <b>Zhushan Lake (I)</b>  | Max.   | 27.60      | 6.59      | 7.36 | 0.25  | 25.26      | 2.27      | 0.083     | 3.18                      | 0.080                     | 54.51                                | 45.95                |
|                          | Min.   | 26.60      | 3.95      | 7.10 | 0.25  | 23.43      | 2.24      | 0.031     | 2.50                      | 0.011                     | 51.63                                | 24.20                |
|                          | Ave.   | 26.87      | 5.44      | 7.17 | 0.14  | 21.68      | 1.93      | 0.049     | 2.15                      | 0.040                     | 49.74                                | 35.76                |
|                          | RSD(%) | 0.38       | 0.92      | 0.15 | 0.06  | 3.29       | 0.45      | 0.021     | 0.72                      | 0.030                     | 4.30                                 | 9.06                 |
| <b>Meiliang Bay (II)</b> | Max.   | 28.30      | 7.76      | 7.43 | 0.14  | 40.22      | 0.52      | 0.067     | 3.38                      | 0.004                     | 94.48                                | 48.75                |
|                          | Min.   | 26.80      | 6.24      | 7.10 | 0.07  | 22.49      | 0.31      | 0.019     | 1.25                      | N.D.                      | 58.92                                | 13.65                |
|                          | Ave.   | 27.60      | 6.85      | 7.32 | 0.10  | 31.80      | 0.42      | 0.040     | 2.54                      | N.D.                      | 67.39                                | 30.20                |
|                          | RSD(%) | 0.60       | 0.73      | 0.13 | 0.03  | 6.88       | 0.09      | 0.020     | 0.84                      | N.D.                      | 15.24                                | 16.49                |
| <b>Gonghu Lake (III)</b> | Max.   | 29.40      | 9.16      | 8.07 | 0.09  | 34.39      | 1.21      | 0.051     | 5.79                      | 0.029                     | 61.84                                | 26.30                |
|                          | Min.   | 27.70      | 7.81      | 7.72 | 0.05  | 16.28      | 0.32      | 0.015     | 1.15                      | N.D.                      | 47.15                                | 9.20                 |
|                          | Ave.   | 28.52      | 8.55      | 7.88 | 0.07  | 23.77      | 0.62      | 0.030     | 2.33                      | 0.010                     | 55.00                                | 17.75                |
|                          | RSD(%) | 0.61       | 0.57      | 0.13 | 0.01  | 6.87       | 0.37      | 0.010     | 1.96                      | 0.010                     | 6.93                                 | 12.09                |
| <b>West Coast (IV)</b>   | Max.   | 28.00      | 7.85      | 7.75 | 0.25  | 39.24      | 2.13      | 0.063     | 2.84                      | 0.040                     | 46.14                                | 193.30               |
|                          | Min.   | 26.80      | 4.14      | 7.06 | 0.07  | 19.09      | 0.40      | 0.027     | 0.67                      | 0.004                     | 38.10                                | 55.05                |
|                          | Ave.   | 27.27      | 6.00      | 7.33 | 0.15  | 26.44      | 1.27      | 0.040     | 1.64                      | 0.020                     | 43.59                                | 135.82               |

|                                  |        |       |      |      |      |       |      |       |      |       |        |        |
|----------------------------------|--------|-------|------|------|------|-------|------|-------|------|-------|--------|--------|
|                                  | RSD(%) | 0.46  | 1.78 | 0.30 | 0.08 | 7.44  | 0.68 | 0.010 | 0.71 | 0.010 | 3.08   | 59.80  |
| <b>South<br/>Lake<br/>(V)</b>    | Max.   | 28.20 | 8.63 | 7.99 | 0.07 | 28.42 | 0.80 | 0.063 | 4.72 | 0.030 | 55.06  | 52.05  |
|                                  | Min.   | 27.70 | 6.01 | 7.45 | 0.05 | 18.80 | 0.53 | 0.019 | 0.67 | 0.005 | 47.58  | 10.40  |
|                                  | Ave.   | 27.92 | 7.24 | 7.72 | 0.06 | 24.61 | 0.68 | 0.030 | 2.41 | 0.020 | 51.55  | 29.19  |
|                                  | RSD(%) | 0.23  | 0.99 | 0.21 | 0.01 | 3.42  | 0.10 | 0.020 | 1.56 | 0.010 | 2.46   | 14.78  |
| <b>East<br/>Coast<br/>(VI)</b>   | Max.   | 30.00 | 9.5  | 8.03 | 0.07 | 27.48 | 1.14 | 0.035 | 1.92 | 0.024 | 182.26 | 51.60  |
|                                  | Min.   | 28.20 | 7.9  | 7.52 | 0.05 | 16.84 | 0.32 | 0.011 | 0.86 | 0.001 | 54.88  | 11.60  |
|                                  | Ave.   | 29.30 | 8.51 | 7.79 | 0.06 | 21.63 | 0.67 | 0.020 | 1.23 | 0.010 | 86.90  | 30.94  |
|                                  | RSD(%) | 0.67  | 0.65 | 0.22 | 0.01 | 5.12  | 0.35 | 0.010 | 0.43 | 0.010 | 54.32  | 18.58  |
| <b>Lake<br/>centre<br/>(VII)</b> | Max.   | 28.20 | 9.31 | 8.27 | 0.11 | 39.00 | 0.86 | 0.047 | 3.33 | 0.039 | 60.87  | 220.20 |
|                                  | Min.   | 27.10 | 7.94 | 7.60 | 0.05 | 19.78 | 0.33 | 0.019 | 0.57 | 0.003 | 42.50  | 16.95  |
|                                  | Ave.   | 27.81 | 8.85 | 7.91 | 0.07 | 25.75 | 0.60 | 0.030 | 1.60 | 0.020 | 56.57  | 52.69  |
|                                  | RSD(%) | 0.34  | 0.49 | 0.24 | 0.02 | 6.83  | 0.17 | 0.010 | 1.21 | 0.010 | 6.56   | 74.39  |

Table S3 Component's matrix. of water quality of Taihu Lake

| %Variance            | Component    |              |              |             |           |
|----------------------|--------------|--------------|--------------|-------------|-----------|
|                      | C1 (30.404%) | C2 (14.698%) | C3 (12.319%) | C4 (8.364%) | C5(5.086) |
| <b>IPMP</b>          | -.241        | .819         | .069         | -.259       | -.125     |
| <b>IBMP</b>          | -.198        | .537         | .013         | .537        | .285      |
| <b>2-MIB</b>         | -.563        | .618         | .054         | -.279       | -.082     |
| <b>geosmin</b>       | .707         | .111         | -.241        | -.226       | .156      |
| <b>β-ionone</b>      | .346         | .752         | -.177        | -.036       | -.085     |
| <b>β-cyclocitral</b> | -.228        | .438         | -.474        | -.115       | .118      |
| <b>Temp.</b>         | -.772        | -.264        | -.046        | -.119       | -.166     |
| <b>DO</b>            | -.846        | -.165        | .183         | .131        | .104      |
| <b>pH</b>            | -.759        | -.046        | -.019        | .335        | .206      |
| <b>UV254</b>         | .703         | .028         | .406         | .005        | -.470     |
| <b>TP</b>            | .646         | .098         | .382         | -.093       | .389      |
| <b>Ammonia</b>       | .298         | .003         | .430         | -.214       | .691      |
| <b>Nitrate</b>       | .518         | -.207        | -.641        | .167        | .250      |
| <b>DOC</b>           | .138         | .081         | .749         | -.165       | -.022     |
| <b>TN</b>            | .856         | -.159        | -.242        | .071        | -.201     |
| <b>Sulfate</b>       | -.346        | -.425        | .141         | -.385       | .012      |
| <b>Chlorophyll-</b>  | .234         | .152         | .437         | .720        | -.146     |

**a**
